# Supplementary material for: Schizorhodopsins: A family of rhodopsins from Asgard archaea that function as light-driven inward H+ pumps
Source: PubMed Central journal article supplement — Sci Adv. 2020 Apr 10;6(15):eaaz2441. doi: 10.1126/sciadv.aaz2441 (PMC7148096; doi:10.1126/sciadv.aaz2441), 2020-04-10
Supplement: aaz2441_SM.pdf [file aaz2441_SM.pdf]

## Supplementary Materials for

### **Schizorhodopsins: A family of rhodopsins from Asgard archaea that function as light-driven inward H<sup>+</sup> pumps**

Keiichi Inoue\*, Satoshi P. Tsunoda, Manish Singh, Sahoko Tomida, Shoko Hososhima, Masae Konno, Ryoko Nakamura, Hiroki Watanabe, Paul-Adrian Bulzu, Horia L. Banciu, Adrian-Ştefan Andrei, Takayuki Uchihashi, Rohit Ghai, Oded Béjà, Hideki Kandori\*

\*Corresponding author. Email: inoue@issp.u-tokyo.ac.jp (K.I.); kandori@nitech.ac.jp (H.K.)

Published 10 April 2020, *Sci. Adv.* **6**, eaaz2441 (2020)  
DOI: 10.1126/sciadv.aaz2441

#### **This PDF file includes:**

Amino acid sequence of SAMEA 2622822\_312577 (SzR2)  
Tables S1 to S5  
Figs. S1 to S7

**Amino acid sequence of SAMEA 2622822\_312577 (SzR2)**

MIETLTMILSLGTLVFFISSIVFAKMDWRQANHFNSALIVSATTAVSYAVMLAIYLGTPTTDSLSTRWLF  
YIISCSLLIYHIKVLRLNQRISAGYLMALIMITGFVAAEVSDLWFVLVIYLIGSAFYVLALKIHWQGT  
HTLAKLKPPLYIGWTGFPIVFLSPAAFDLISLDSALALYLGLDIYTKIVFYKDYNQLVR

**Table S1. Retinal configuration in SzR1.** The composition of the retinal isomers in SzR1 determined by HPLC analysis for retinal oxime produced by the hydrolysis of retinylidene Schiff base with hydroxylamine.

| Isomer           | Dark         | Light        |
|------------------|--------------|--------------|
| <i>all-trans</i> | 94.48 ± 0.5% | 72.92 ± 0.2% |
| <i>13-cis</i>    | N.O.         | 12.24 ± 0.6% |
| <i>11-cis</i>    | 5.51 ± 0.5%  | 14.83 ± 0.2% |

N.O.: Not observed

**Table S2. Normalization factors of SzR1 FTIR spectra shown in Fig. 5, A and B in 0% glycerol condition.**

| Intermediate (solvent) | Normalization factors |
|------------------------|-----------------------|
| K (H <sub>2</sub> O)   | 1                     |
| K (D <sub>2</sub> O)   | 1.35                  |
| L (H <sub>2</sub> O)   | 4.20                  |
| L (D <sub>2</sub> O)   | 5.66                  |
| L/M (H <sub>2</sub> O) | 3.39                  |
| L/M (H <sub>2</sub> O) | 4.49                  |
| M (H <sub>2</sub> O)   | 0.79                  |
| M (H <sub>2</sub> O)   | 0.79                  |

**Table S3. Normalization factors of SzR1 FTIR spectra (30% glycerol) shown in Fig. 5C in 30% glycerol.**

| Intermediate (solvent)             | Normalization factors |
|------------------------------------|-----------------------|
| K (D <sub>2</sub> O)               | 1                     |
| K (D <sub>2</sub> <sup>18</sup> O) | 1.05                  |
| M (D <sub>2</sub> O)               | 1.63                  |
| M (D <sub>2</sub> <sup>18</sup> O) | 1.83                  |

**Table S4. List of primers used for site-directed mutagenesis.**

| Mutations    | Sense primers                                                | Anti-sense primers                                           |
|--------------|--------------------------------------------------------------|--------------------------------------------------------------|
| SzR1 E2Q     | CCGATGTAGAAAATGATTCCTG<br>CATATGTATATCTCCTTCTTAAA            | TTTAAGAAGGAGATATACATATG<br>CAGGAAATCATTTTCTACATCGG           |
| SzR1 E3Q     | CGCACCGATGTAGAAAATGATCT<br>GCTCCATATGTATATCTCCTTC            | GAAGGAGATATACATATGGAGC<br>AGATCATTTTCTACATCGGTGCG            |
| SzR1 E2Q/E3Q | CCCGCACCGATGTAGAAAATGAT<br>CTGCTGCATATGTATATCTCCTTC<br>TTAAA | TTTAAGAAGGAGATATACATATG<br>CAGCAGATCATTTTCTACATCGG<br>TGCGGG |
| SzR1 R67Q    | CCGCATAGAACGCCCACTGGGTC<br>CAGTAGATGCT                       | AGCATCTACTGGACCCAGTGGGC<br>GTTCTATGCGG                       |
| SzR1 R67A    | CGCATAGAACGCCCAAGCGGTCC<br>AGTAGATGCTG                       | CAGCATCTACTGGACCGCTTGGG<br>CGTTCTATGCG                       |
| SzR1 F70D    | AGCTCACCGCATAGTCCGCCCAA<br>CGGGTCC                           | GGACCCGTTGGGCGGACTATGCG<br>GTGAGCT                           |
| SzR1 F70E    | GCAGCTCACCGCATACTCCGCCC<br>AACGGGTCCA                        | TGGACCCGTTGGGCGGAGTATGC<br>GGTGAGCTGC                        |
| SzR1 F70A    | GGACCCGTTGGGCGGCCTATGCG<br>GTGAGCT                           | AGCTCACCGCATAGGCCGCCCAA<br>CGGGTCC                           |
| SzR1 C75A    | CAACCATCAGAAAGCTGGCGCTC<br>ACCGCATAGAACG                     | CGTTCTATGCGGTGAGCGCCAGC<br>TTTCTGATGGTTG                     |
| SzR1 C75S    | GTTCTATGCGGTGAGCAGCAGCT<br>TTCTGATGGT                        | ACCATCAGAAAGCTGCTGCTCAC<br>CGCATAGAAC                        |
| SzR1 C75T    | CAACCATCAGAAAGCTGGTGCTC<br>ACCGCATAGAACG                     | CGTTCTATGCGGTGAGCACCAGC<br>TTTCTGATGGTTG                     |
| SzR1 E81D    | GCTCAGCAGCATGCTAATATCAA<br>CCATCAGAAAGCTG                    | CAGCTTTCTGATGGTTGATATTA<br>GCATGCTGCTGAGC                    |
| SzR1 E81Q    | CAGCATGCTAATCTGAACCATCA<br>GAAAGCTGCAG                       | CTGCAGCTTTCTGATGGTTCAGA<br>TTAGCATGCTG                       |
| SzR1 E95D    | CAGGCAGTTGAACACAATGATAT<br>CCAGCTTAATGCTTTTATCG              | CGATAAAAGCATTAAAGCTGGATA<br>TCATTGTGTTCAACTGCCTG             |
| SzR1 E95Q    | CCAGGCAGTTGAACACAATGATC<br>TGCAGCTTAATGCTTTTATCGAT<br>G      | CATCGATAAAAGCATTAAAGCTGC<br>AGATCATTGTGTTCAACTGCCTG<br>G     |
| SzR1 D184N   | AAACCTTGGTGATCAGATTCAGC<br>ACCAGGTAACACAG                    | CTGTTTTACCTGGTGCTGAATCT<br>GATACCAAGTTT                      |
| SzR2 H82F    | CGCAGAACCTTCGCAATGAAATA<br>GATCAGCAGGCTGCA                   | TGCAGCCTGCTGATCTATTTTATT<br>GCGAAGGTTCTGCG                   |
| SzR2 E113Q   | CACAGATCGCTCACCTGCGCCGC<br>CACGAAGC                          | GCTTCGTGGCGGCGCAGGTGAGC<br>GATCTGTG                          |
| SzR2 D197E   | CGCACCAGTTGATTGTACTCCTT<br>GTAGAACACGAT                      | ATCGTGTCTACAAGGAGTACAA<br>TCAACTGGTGCG                       |
| SzR2 D197N   | CAAATCGTGTTCTACAAGAACT<br>ACAATCAACTGGTGCG                   | CGCACCAGTTGATTGTAGTTCTT<br>GTAGAACACGATTTT                   |

**Table S5. List of primers used for subcloning into mammalian expression vector.**

| Gene                  | Sense primers                             | Anti-sense primers                       |
|-----------------------|-------------------------------------------|------------------------------------------|
| SzR_AM_5_00977        | TTCGAATTCGCCACCATGG<br>AGCAGATCATTTTCTAC  | GCTCTTTGGATCCCCCTGT<br>TCGATGTGCTTAAAGG  |
| SzR1                  | TTCGAATTCGCCACCATGG<br>AGGAAATCATTTTCTAC  | GCTCTTTGGATCCCCCTTG<br>CTAAATTCAGGGTGG   |
| SzR3                  | TTCGAATTCGCCACCATGG<br>AGGAAATCATTTTCTTTG | GCTCTTTGGATCCCCGTTT<br>TTGGTATACTTAAAGG  |
| SzR_TE_8S_00242       | TTCGAATTCGCCACCATGG<br>AGGAAATCATCTTCTAC  | GCTCTTTGGATCCCCCGCT<br>TCGGTCGCCTCTTTC   |
| SzR_TE_S2S_00499      | TTCGAATTCGCCACCATGG<br>CGGGCGAGGAATTCATC  | GCTCTTTGGATCCCCTTTA<br>ACACGGGTATACAGG   |
| SzR_un_Tekir_02407    | TTCGAATTCGCCACCATGG<br>AGGAAATCATTTTCTAC  | GCTCTTTGGATCCCCCATG<br>TTGGTATACTTCAGG   |
| SzR2                  | TTCGAATTCGCCACCATGA<br>TTGAGACCCTGACCATG  | GCTCTTTGGATCCCCACGC<br>ACCAGTTGATTGTAGTC |
| SzR_TE_S2S_00499-cMyc | TCAGAAGAGGATCTGTTCT<br>GCTACGAGAACG       | GATGAGTTTTTGTTCCTTG<br>TACAGCTCGTC       |

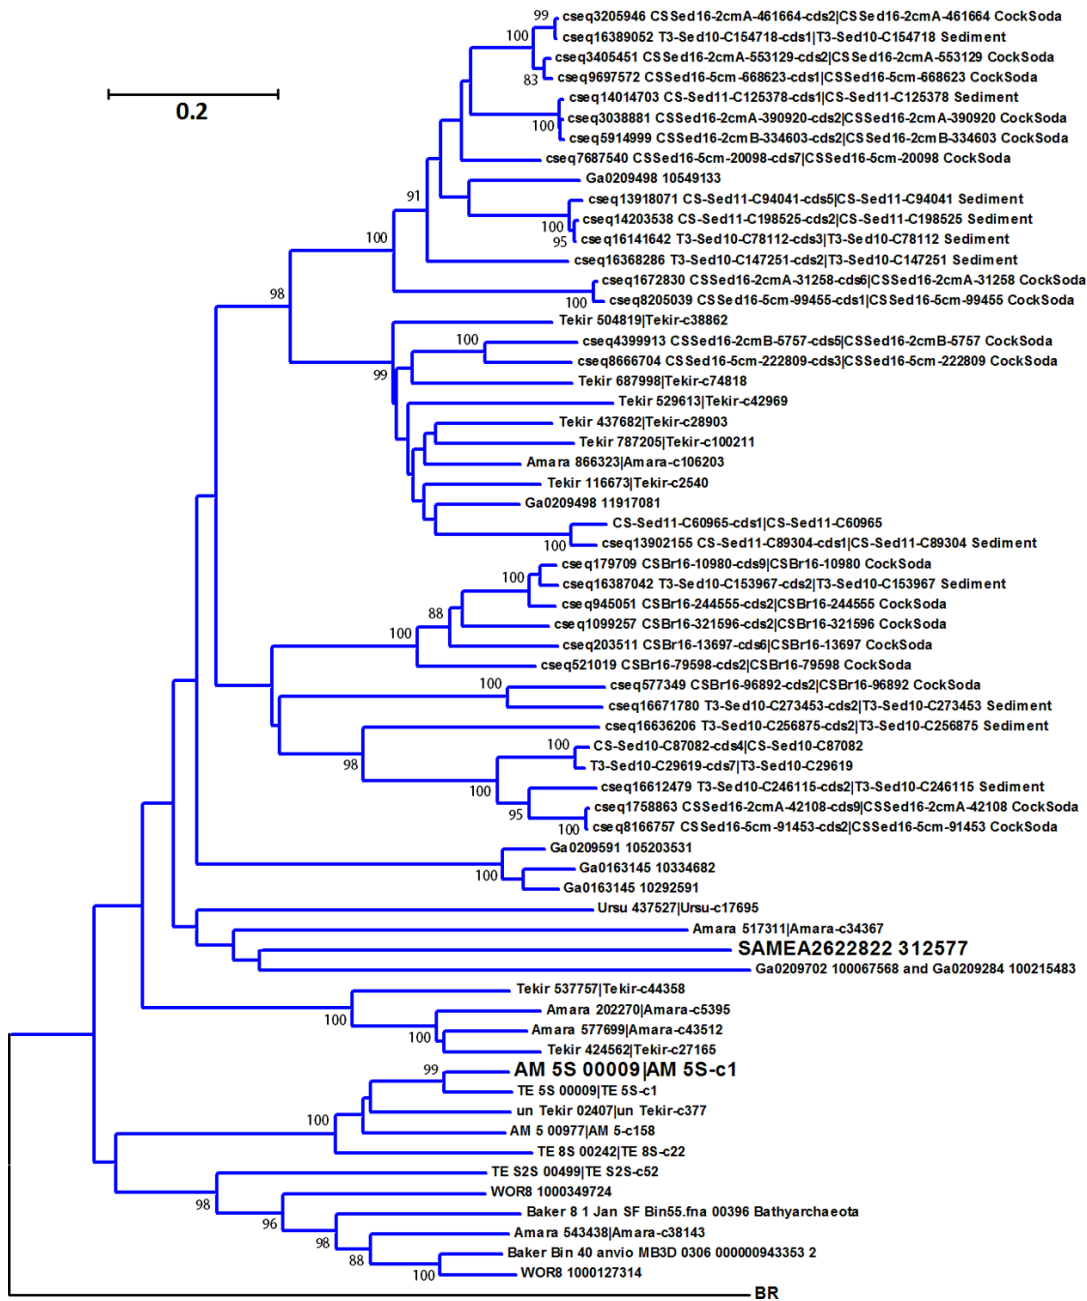

**Fig. S1. Phylogenetic tree of SzRs.** To investigate the phylogenetic relationship of 63 SzRs with BR as an out-group, their amino acid sequences were aligned using ClustalW (5). The evolutionary history was inferred using the Neighbor-Joining method (5). The optimal tree with the sum of branch length = 12.94306572 is shown. The percentage of replicate trees in which the associated taxa clustered together in the bootstrap test (100 replicates) are shown next to the branches (5). The tree is drawn to scale, with branch lengths in the same units as those of the evolutionary distances used to infer the phylogenetic tree. The evolutionary distances were computed using the Poisson correction method (5) and are in the

units of the number of amino acid substitutions per site. The analysis involved 64 amino acid sequences. All ambiguous positions were removed for each sequence pair. There were a total of 263 positions in the final dataset. Evolutionary analyses were conducted in MEGA6 (5). The percentage of replicate trees higher than 80, in which the associated taxa clustered together in the bootstrap test, are shown next to the branches.

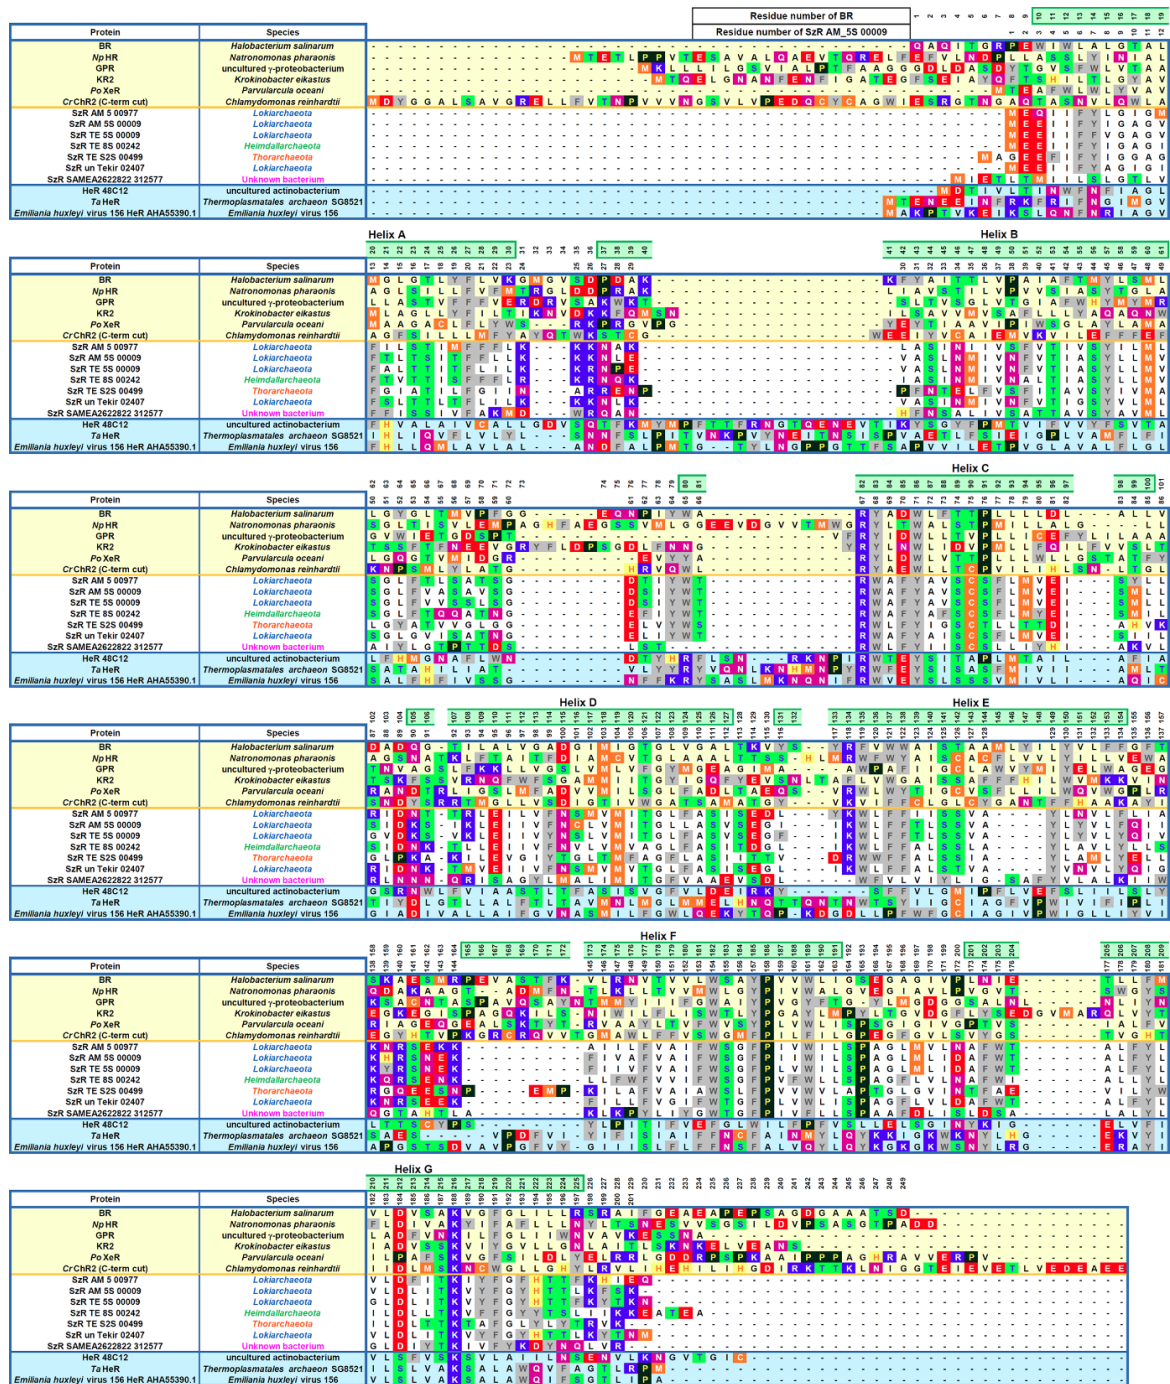

**Fig. S2. Multiple amino acid sequential alignments of SzRs with typical microbial rhodopsins.** The amino acid sequences were aligned using ClustalW (5). Bacteriorhodopsin (BR), *Natronomonas pharaonis* halorhodopsin (NpHR), green-absorbing proteorhodopsin (GPR), *Krokinobacter rhodopsin 2* (KR2), *Parvularcula oceani* XeR (PoXeR), *Chlamydomonas reinhardtii* channelrhodopsin 2 (CrChr2), and HeRs (HeR 48C12, *Thermoplasmales* archaeon SG8521 heliorhodopsin (TaHeR) and *Emiliana huxleyi* virus 156 HeR AHA55390.1) were aligned with the sequences of SzRs. Typical microbial



rhodopsins and HeRs are denoted in yellow and cyan. The residue numbers of BR and SzR1 (SzR AM\_5S\_00009) are shown on top of the residues, and the position of transmembrane helix of BR based on the X-ray crystallographic structure (PDB ID: 1M0L) are indicated by green rectangles.

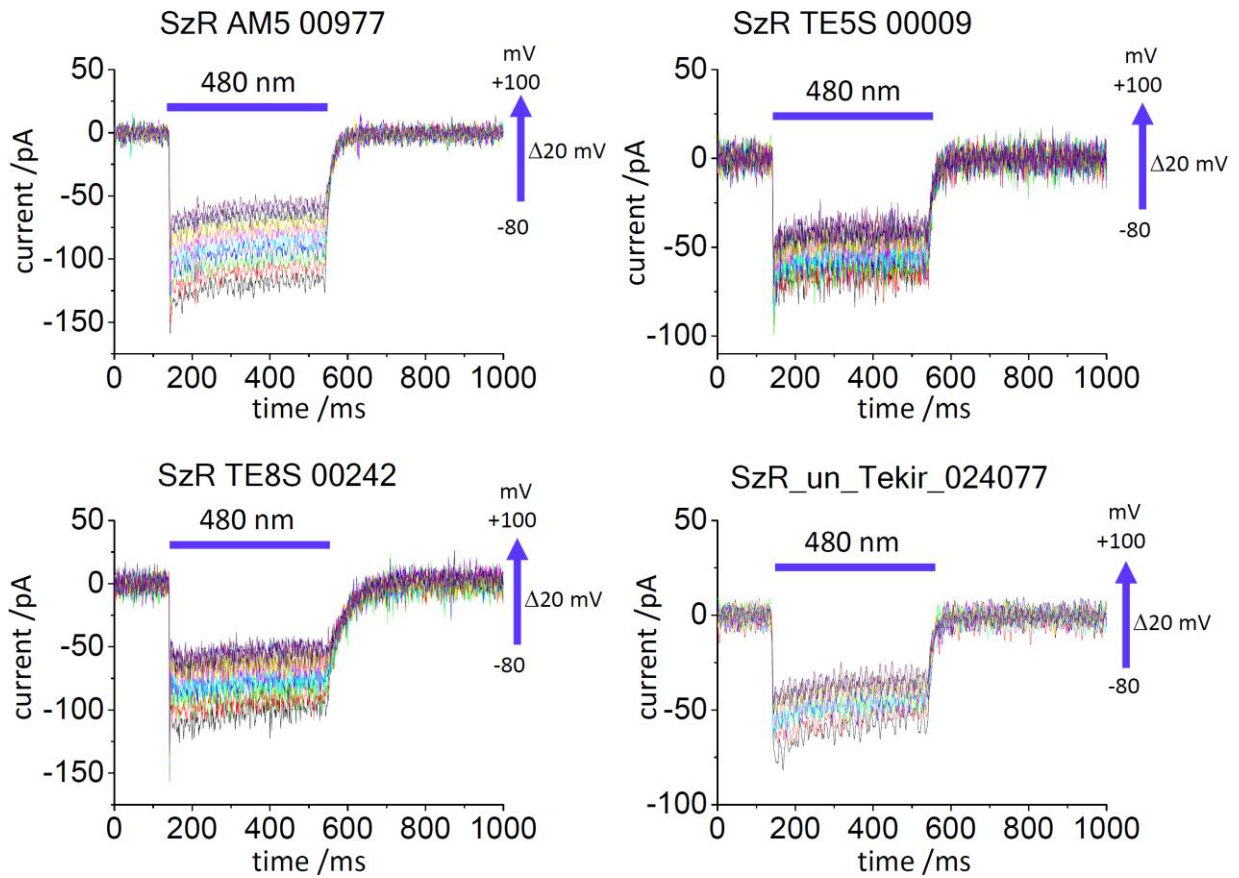

**Fig. S3. Electrophysiological measurements of SzR-driven photocurrent in ND7/23 cells.** The cells were illuminated with light ( $\lambda = 480$  nm) during the time region shown by blue bars. The membrane voltage was scanned from  $-80$  to  $+100$  mV for every  $20$  mV.

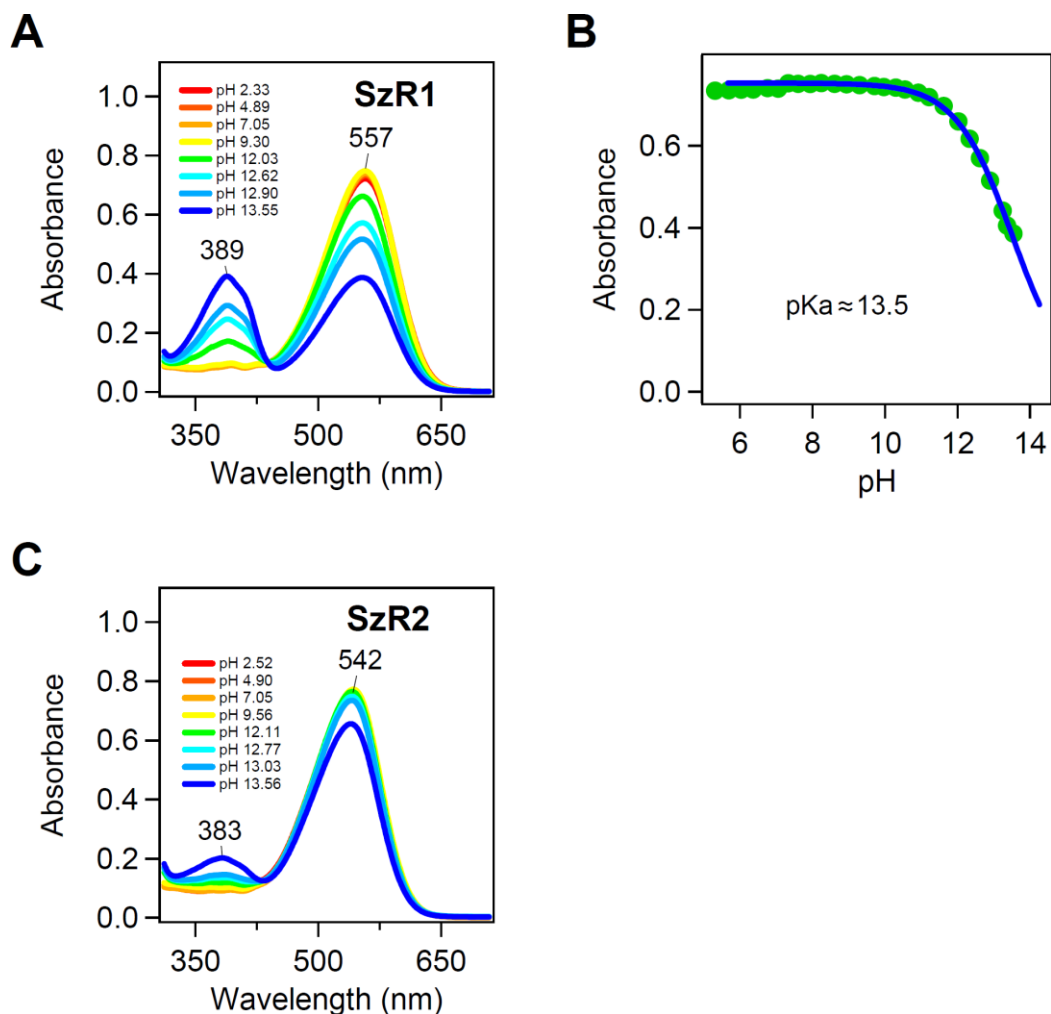

**Fig. S4. pH dependence of the absorption of SzR1 and SzR2.** (A and B) Absorption spectra of SzR1 (A) and the absorbance at 557 nm (B) at different pH. SzR1 showed a significant deprotonation of RSB at alkaline pH, and its  $pK_a$  was estimated to be  $\sim 13.5$  by fitting the absorption change at 557 nm (green circles in B) with the Henderson–Hasselbalch equation (blue solid line in B). (C) Absorption spectra SzR2 at different pH. The proteins were solubilized in 100 mM NaCl, 6-mix buffer (citrate, MES, HEPES, MOPS, CHES, CAPS (25 mM each)), and 0.05% DDM.

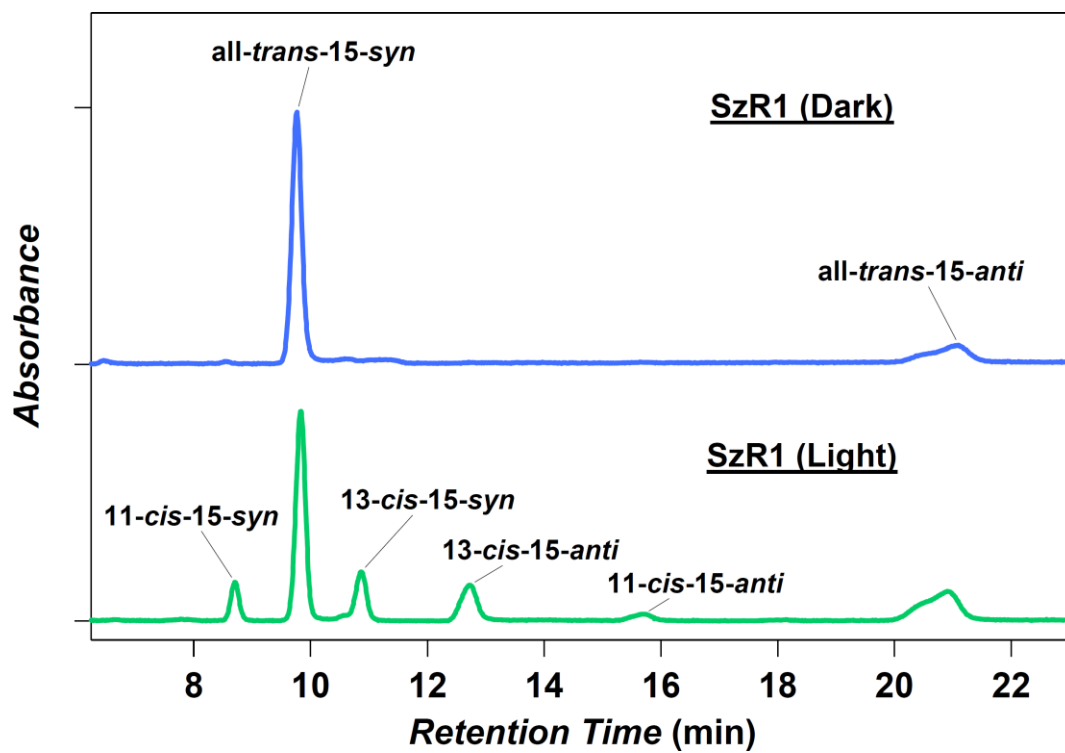

**Fig. S5. HPLC analysis of the retinal configuration in SzR1.** The HPLC pattern of the retinal extracted from SzR1 both in dark and light-adapted conditions. The compositions of the retinal isomers in dark and light-adapted conditions are shown in Table S1.

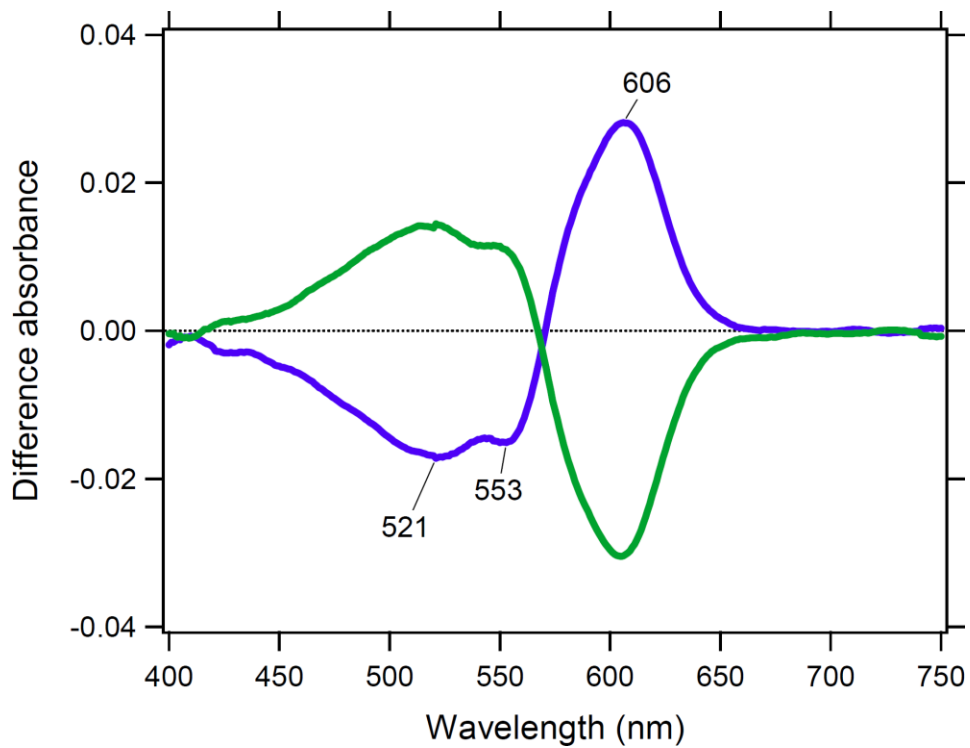

**Fig. S6. Light-induced low-temperature differences in UV-visible absorption spectroscopy of SzR1.** The K-minus-dark (blue) and dark-minus-K (green) light-induced low-temperature differences UV-visible absorption spectra obtained by illuminating at 520 and  $> 590$  nm at  $T = 110$  K.

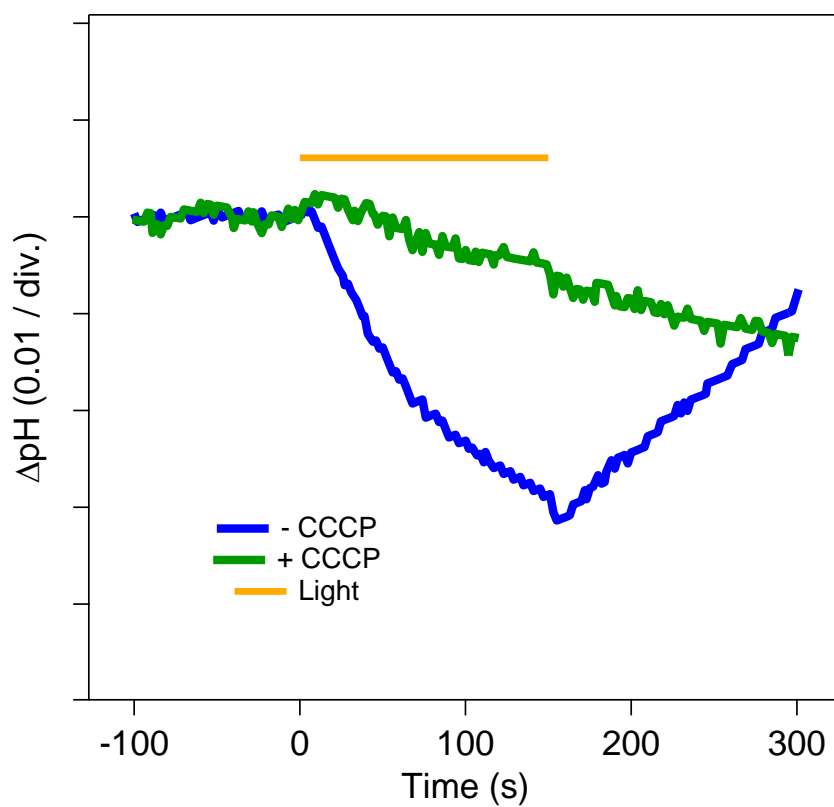

**Fig. S7. Light-driven active inward  $\text{H}^+$  transport by Heimdallarchaeia DTK rhodopsin.** The signals were measured in the absence (blue) and presence (green) of CCCP in 100 mM NaCl at pH  $\sim$  7.0. Light ( $\lambda > 500$  nm) was illuminated at  $t = 0$ –150 s (indicated with a yellow bar).
